# Supplementary material
Source: MDPI journal article supplement (https://www.mdpi.com/2073-4344/14/1/56)
Supplement: s1 [file s1]

## Supplementary Information

# Increasing Al-Pair Abundance in SSZ-13 Zeolite via Zeolite Synthesis in the Presence of Alkaline Earth Metal Hydroxide Produces Hydrothermally Stable Co-, Cu- and Pd-SSZ-13 Materials

Konstantin Khivantsev <sup>1,\*†</sup>, Mirosław A. Derewinski <sup>1,2,\*†</sup>, Libor Kovarik <sup>1</sup>, Mark Bowden <sup>1</sup>, Xiaohong Shari Li <sup>1</sup>, Nicholas R. Jaegers <sup>1</sup>, Daria Boglajenko <sup>1</sup>, Xavier I. Pereira-Hernandez <sup>1</sup>, Carolyn Pearce <sup>1</sup>, Yong Wang <sup>1,3</sup> and Janos Szanyi <sup>1,\*</sup>

<sup>1</sup> Pacific Northwest National Laboratory, Richland, WA 99352, USA; libor.kovarik@pnnl.gov (L.K.); mark.bowden@pnnl.gov (M.B.); xiaohong.li@pnnl.gov (X.S.L.); njaegers@berkeley.edu (N.R.J.); daria.boglajenko@pnnl.gov (D.B.); vruatsa@gmail.com (X.I.P.-H.); carolyn.pearce@pnnl.gov (C.P.); wang42@wsu.edu (Y.W.)

<sup>2</sup> J. Haber Institute of Catalysis and Surface Chemistry, Polish Academy of Sciences, 30-239 Krakow, Poland

<sup>3</sup> The Gene and Linda Voiland School of Chemical Engineering and Bioengineering, Washington State University, Pullman, WA 99164, USA

\* Correspondence: konstantin.khivantsev@pnnl.gov (K.K.); ncderewi@cyf-kr.edu.pl (M.A.D.); janos.szanyi@pnnl.gov (J.S.)

† These authors contributed equally to this work.

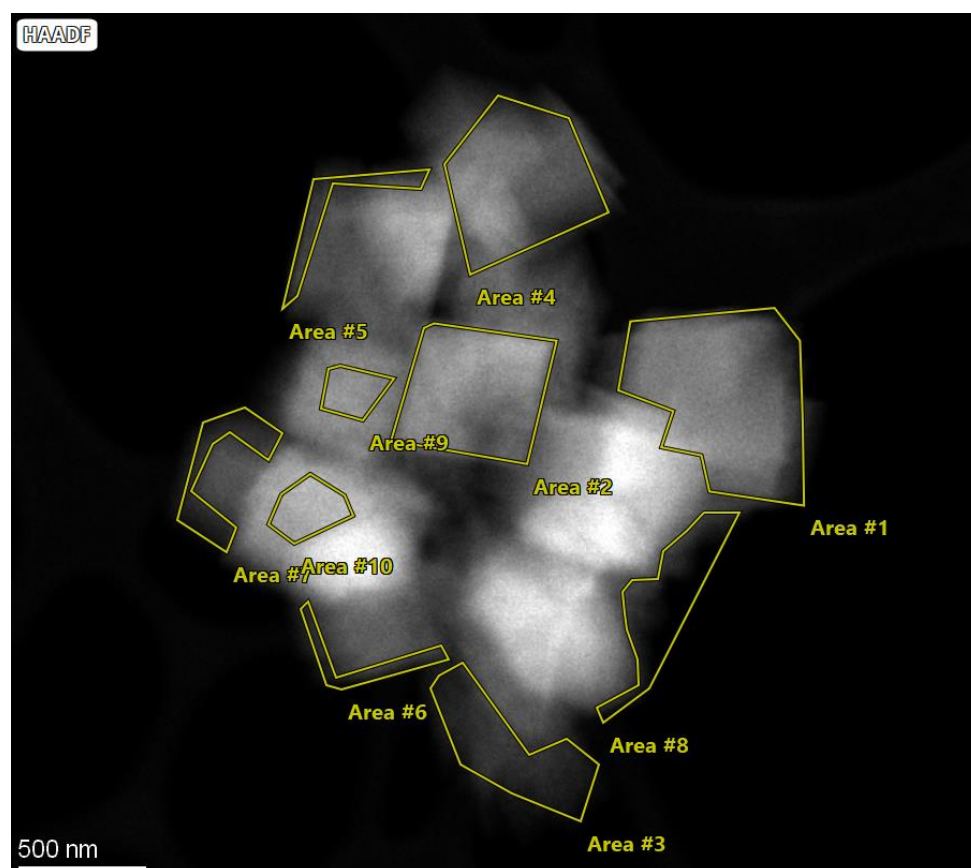

**Figure S1.** EDS mapping chosen on different areas of H-SSZ-13 (Sr) crystals. The corresponding tabulated values are shown in Table S1.

**Table S1.** Atomic and weight percentages of Si, Al, and O EDS mapped in Fig. 1.

| <b>Z</b> | <b>Element</b> | <b>Family</b> | <b>Atomic Fraction (%)</b> | <b>Atomic Error (%)</b> | <b>Mass Fraction (%)</b> | <b>Mass Error (%)</b> | <b>Fit Error (%)</b> |
|----------|----------------|---------------|----------------------------|-------------------------|--------------------------|-----------------------|----------------------|
| 8        | O              | K             | 65.00                      | 4.02                    | 51.50                    | 4.43                  | 0.84                 |
| 13       | Al             | K             | 3.02                       | 0.61                    | 4.03                     | 0.84                  | 0.82                 |
| 14       | Si             | K             | 31.98                      | 4.19                    | 44.47                    | 4.76                  | 0.97                 |

2023-11-04T22:09:29-0700 Analysis of spectrum: Spectra from Area #1.

| <b>Z</b> | <b>Element</b> | <b>Family</b> | <b>Atomic Fraction (%)</b> | <b>Atomic Error (%)</b> | <b>Mass Fraction (%)</b> | <b>Mass Error (%)</b> | <b>Fit Error (%)</b> |
|----------|----------------|---------------|----------------------------|-------------------------|--------------------------|-----------------------|----------------------|
| 8        | O              | K             | 65.30                      | 3.97                    | 51.83                    | 4.39                  | 0.40                 |
| 13       | Al             | K             | 3.22                       | 0.65                    | 4.31                     | 0.89                  | 0.29                 |
| 14       | Si             | K             | 31.48                      | 4.15                    | 43.86                    | 4.74                  | 0.52                 |

2023-11-04T22:09:29-0700 Analysis of spectrum: Spectra from Area #2.

| <b>Z</b> | <b>Element</b> | <b>Family</b> | <b>Atomic Fraction (%)</b> | <b>Atomic Error (%)</b> | <b>Mass Fraction (%)</b> | <b>Mass Error (%)</b> | <b>Fit Error (%)</b> |
|----------|----------------|---------------|----------------------------|-------------------------|--------------------------|-----------------------|----------------------|
| 8        | O              | K             | 69.00                      | 3.75                    | 56.00                    | 4.33                  | 0.55                 |
| 13       | Al             | K             | 2.85                       | 0.57                    | 3.90                     | 0.80                  | 1.05                 |
| 14       | Si             | K             | 28.14                      | 3.89                    | 40.09                    | 4.62                  | 0.16                 |

2023-11-04T22:09:29-0700 Analysis of spectrum: Spectra from Area #3.

| <b>Z</b> | <b>Element</b> | <b>Family</b> | <b>Atomic Fraction (%)</b> | <b>Atomic Error (%)</b> | <b>Mass Fraction (%)</b> | <b>Mass Error (%)</b> | <b>Fit Error (%)</b> |
|----------|----------------|---------------|----------------------------|-------------------------|--------------------------|-----------------------|----------------------|
| 8        | O              | K             | 69.28                      | 3.76                    | 56.32                    | 4.36                  | 0.58                 |
| 13       | Al             | K             | 2.85                       | 0.58                    | 3.90                     | 0.82                  | 4.38                 |
| 14       | Si             | K             | 27.87                      | 3.89                    | 39.78                    | 4.64                  | 2.35                 |

2023-11-04T22:09:29-0700 Analysis of spectrum: Spectra from Area #6.

| <b>Z</b> | <b>Element</b> | <b>Family</b> | <b>Atomic Fraction (%)</b> | <b>Atomic Error (%)</b> | <b>Mass Fraction (%)</b> | <b>Mass Error (%)</b> | <b>Fit Error (%)</b> |
|----------|----------------|---------------|----------------------------|-------------------------|--------------------------|-----------------------|----------------------|
| 8        | O              | K             | 64.99                      | 3.97                    | 51.50                    | 4.37                  | 0.27                 |
| 13       | Al             | K             | 3.41                       | 0.68                    | 4.55                     | 0.94                  | 0.48                 |
| 14       | Si             | K             | 31.60                      | 4.15                    | 43.95                    | 4.75                  | 0.12                 |

2023-11-04T22:09:29-0700 Analysis of spectrum: Spectra from Area #4.

| <b>Z</b> | <b>Element</b> | <b>Family</b> | <b>Atomic Fraction (%)</b> | <b>Atomic Error (%)</b> | <b>Mass Fraction (%)</b> | <b>Mass Error (%)</b> | <b>Fit Error (%)</b> |
|----------|----------------|---------------|----------------------------|-------------------------|--------------------------|-----------------------|----------------------|
| 8        | O              | K             | 66.96                      | 3.82                    | 53.70                    | 4.31                  | 0.77                 |
| 13       | Al             | K             | 3.57                       | 0.71                    | 4.83                     | 0.99                  | 1.61                 |
| 14       | Si             | K             | 29.47                      | 4.00                    | 41.48                    | 4.68                  | 0.46                 |

2023-11-04T22:09:29-0700 Analysis of spectrum: Spectra from Area #5.

| <b>Z</b> | <b>Element</b> | <b>Family</b> | <b>Atomic Fraction (%)</b> | <b>Atomic Error (%)</b> | <b>Mass Fraction (%)</b> | <b>Mass Error (%)</b> | <b>Fit Error (%)</b> |
|----------|----------------|---------------|----------------------------|-------------------------|--------------------------|-----------------------|----------------------|
| 8        | O              | K             | 68.61                      | 3.82                    | 55.54                    | 4.39                  | 0.68                 |
| 13       | Al             | K             | 2.60                       | 0.53                    | 3.55                     | 0.74                  | 3.10                 |
| 14       | Si             | K             | 28.78                      | 3.95                    | 40.90                    | 4.66                  | 1.22                 |

2023-11-04T22:09:29-0700 Analysis of spectrum: Spectra from Area #7.

| Z  | Element | Family | Atomic Fraction (%) | Atomic Error (%) | Mass Fraction (%) | Mass Error (%) | Fit Error (%) |
|----|---------|--------|---------------------|------------------|-------------------|----------------|---------------|
| 8  | O       | K      | 65.59               | 3.96             | 52.15             | 4.39           | 0.57          |
| 13 | Al      | K      | 3.16                | 0.63             | 4.23              | 0.88           | 1.76          |
| 14 | Si      | K      | 31.25               | 4.13             | 43.62             | 4.74           | 0.50          |

2023-11-04T22:09:29-0700 Analysis of spectrum: Spectra from Area #10.

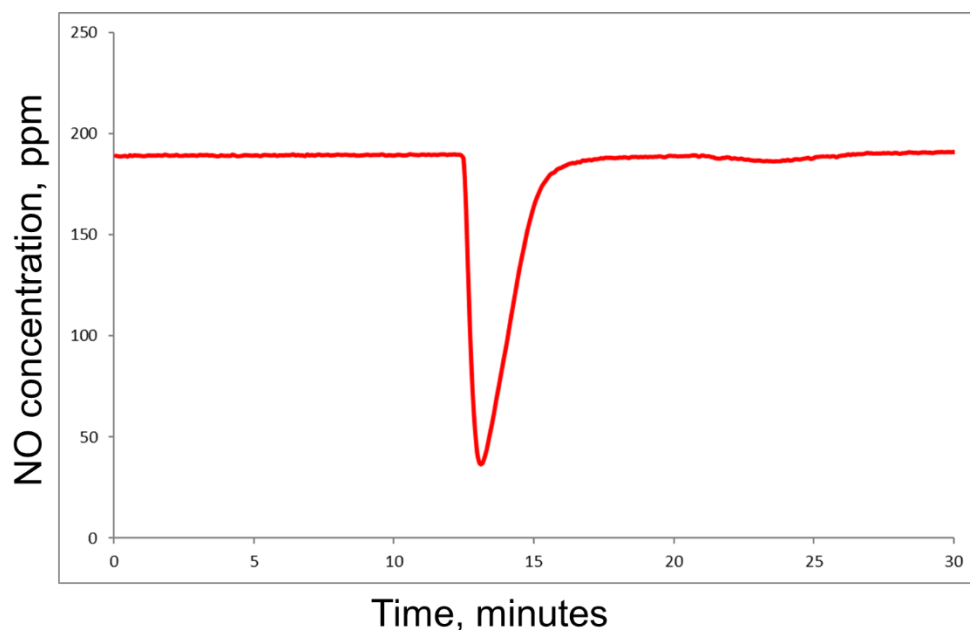

**Figure S2.** NO<sub>x</sub> adsorption on Co-SSZ-13 sample (derived from NaOH and hydrothermally aged at 870 °C) at 100 °C for 20 min (after 10 min bypass). The feed gas mixture contains 220 ppm of NO<sub>x</sub>, 14% O<sub>2</sub> and 300 ppm H<sub>2</sub>O. Sample mass 120 mg. Total flow rate 300 sscm/min. It is obvious that only a relatively small uptake of NO is observed, consistent with much lower hydrothermal stability of Co-SSZ-13 (Na) sample. If the structure were preserved, no loss of activity would be observed.

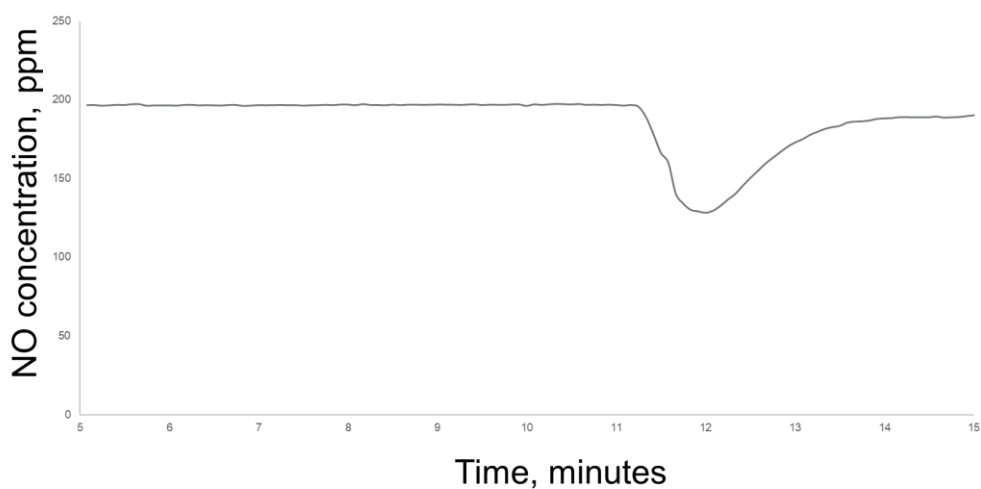

**Figure S3.** NO<sub>x</sub> adsorption on 850 °C hydrothermally aged 1.7 wt% Pd/Co-SSZ-13 sample derived from NaOH synthetic route at 100 °C for 5 min (after 10 min bypass). The feed gas mixture contains 220 ppm of NO<sub>x</sub>, 250 ppm CO, 14% O<sub>2</sub> and 3% H<sub>2</sub>O. Sample mass 120 mg. Total flow rate 300 sscm/min. Rather small uptake of NO occurs, consistent with material degradation.

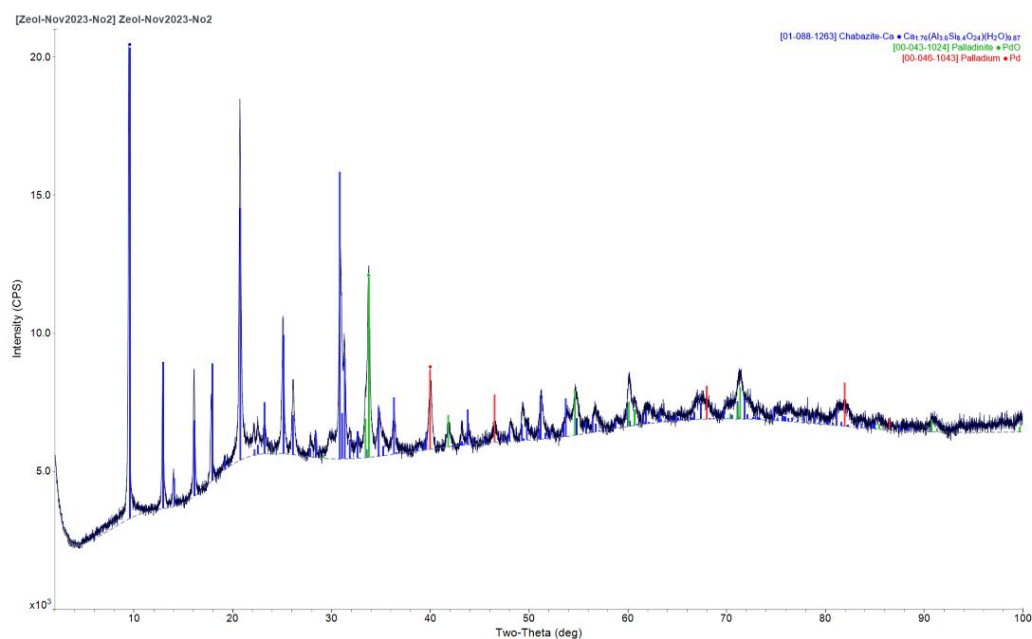

**Figure S4.** XRD pattern of Pd/SSZ-13 (Sr) sample hydrothermally aged at 930 °C. Blue ticks indicate the SSZ-13 crystalline phase reflections. Red ticks indicate the Pd metal presence. Green ticks indicate PdO presence.

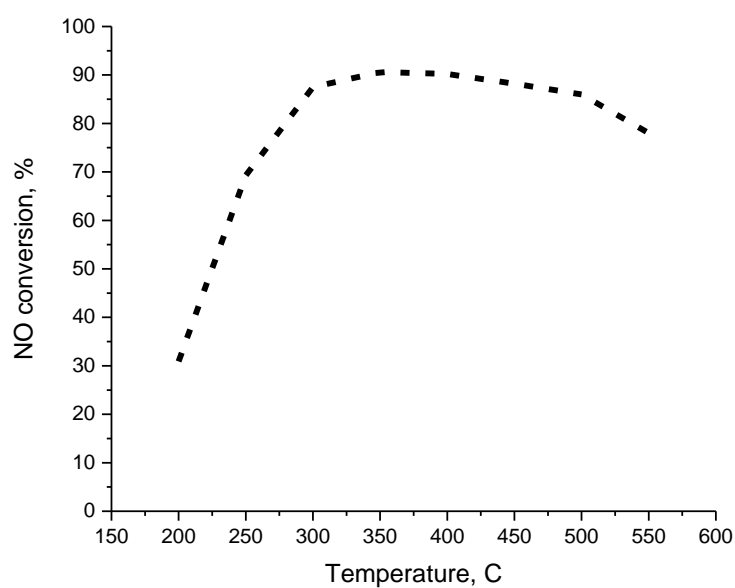

**Figure S5.** NO conversion vs Temperature. Conditions: 120 mg, 2.5 % wt% Cu/SSZ-13(Sr), 360 ppm NH<sub>3</sub>, 360 ppm NO, 14% O<sub>2</sub>, 2.4 % H<sub>2</sub>O and balanced with N<sub>2</sub>. The total flow rate 300 ml/min. GHSV 150 L/g\*hr. The sample was aged at 920 °C in air/ 10% H<sub>2</sub>O flow for 3 hours before catalysis.
